# Supplementary material
Source: MDPI journal article supplement (https://www.mdpi.com/search?q=nanomaterials-10-01586)
Supplement: s001 [file nanomaterials-10-01586-s001.pdf]

Article

# Photo-Induced Black Phase Stabilization of CsPbI<sub>3</sub> QDs Films

Eider A. Erazo <sup>1,2</sup>, H.E. Sánchez-Godoy <sup>1,3</sup>, Andrés F. Gualdrón-Reyes <sup>1</sup>, Sofia Masi <sup>1,\*</sup> and Iván Mora-Seró <sup>1,\*</sup>

<sup>1</sup> Institute of Advanced Materials (INAM), Universitat Jaume I (UJI), Avenida de Vicent Sos Baynat, s/n, 12071 Castellón de la Plana, Spain; ea.erazo@uniandes.edu.co (E.A.E.); Humberto.Sanchez@academico.udg.mx (H.E.S.-G.); gualdron@uji.es (A.F.G.-R.)

<sup>2</sup> Departamento de Química, Universidad de los Andes, Bogotá D.C. 111711, Colombia

<sup>3</sup> Universidad de Guadalajara, Centro Universitario de los Lagos, Lagos de Moreno, Jalisco, C.P. 47460, Mexico

\* Correspondence: masi@uji.es (S.M.); sero@uji.es (I.M.-S.)

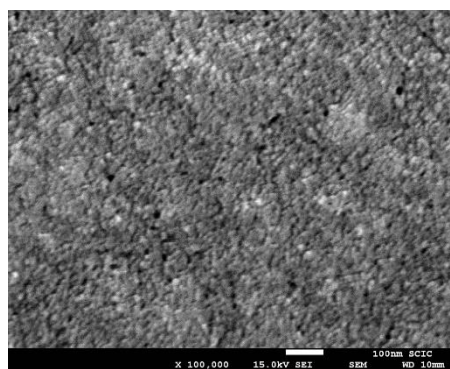

**Figure S1.** Top view SEM image of the CsPbI<sub>3</sub> QDs 3 layer film with higher magnification.

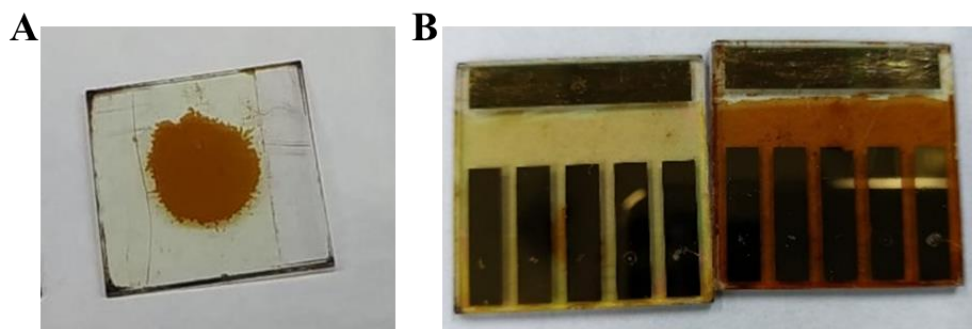

**Figure S2.** (a) Picture of accidental detachment of photoactive layer after EtOAc washing in a device with 1 min UV treatment. (b) Pictures of the solar cells after air exposure, left EtOAc and right UV treated device.

**Table S1.** Photovoltaic parameters extracted from J–Vs scans, best device of each variation.

| Variation         | J <sub>sc</sub> (mA/cm <sup>2</sup> ) | V <sub>oc</sub> (V) | FF (%) | PCE (%) |
|-------------------|---------------------------------------|---------------------|--------|---------|
| EtOAc 3 layers    | 8.2                                   | 0.992               | 70.5   | 5.8     |
| EtOAc 5 layers    | 9.6                                   | 1.011               | 63.6   | 6.2     |
| UV 2 min 3 layers | 10.4                                  | 1.031               | 69.0   | 7.4     |
| UV 2 min 5 layers | 8.3                                   | 1.041               | 60.2   | 5.2     |
| UV 4 min 3 layers | 8.2                                   | 0.982               | 70.9   | 5.7     |

**Table S2.** Time resolved PL decay fitting parameters with a biexponential function.

| <b>Sample</b>             | <b><math>\tau_1</math> (ns)</b> | <b>B<sub>1</sub> (%)</b> | <b><math>\tau_2</math> (ns)</b> | <b>B<sub>2</sub> (%)</b> | <b><math>\tau_{ave}</math> (ns)</b> |
|---------------------------|---------------------------------|--------------------------|---------------------------------|--------------------------|-------------------------------------|
| CsPbI <sub>3</sub> -EtOAc | 15.5                            | 8.4                      | 0.65                            | 91.6                     | 1.9                                 |
| CsPbI <sub>3</sub> -UV    | 25.0                            | 46                       | 0.57                            | 54                       | 11.8                                |

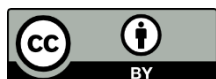

© 2020 by the authors. Licensee MDPI, Basel, Switzerland. This article is an open access article distributed under the terms and conditions of the Creative Commons Attribution (CC BY) license (<http://creativecommons.org/licenses/by/4.0/>).
